# Supplementary material
Source: PubMed Central journal article supplement (PMC8886453)
Supplement: jamapediatr-e220020-s003.pdf [file jamapediatr-e220020-s003.pdf]

## Supplementary Online Content

Mank E, Sáenz de Pipaón M, Lapillonne A, et al; FIT-04 Study Group. Efficacy and safety of enteral recombinant human insulin in preterm infants: a randomized clinical trial. *JAMA Pediatr*. Published online February 28, 2022. doi:10.1001/jamapediatrics.2022.0020

**eTable 1.** The FIT-04 Site Collaborators

**eTable 2.** Trial Steering Committee Members

**eTable 3.** Enteral Nutrition Recommendation in the Study Protocol (ESPGHAN guidelines)

**eTable 4.** Total Fluid (Enteral and Parenteral) and Nutritive Components

**eTable 5.** Prespecified Sensitivity Analysis of the Primary Outcome

### **eReferences**

This supplementary material has been provided by the authors to give readers additional information about their work.

**eTable 1.** The FIT-04 Site Collaborators

The following hospitals, investigators, and research nurses participated in the FIT-04 trial. Study sites are listed alphabetically.

| Country  | City           | Site name                                                                                    | Site collaborator name(s)                                                        |
|----------|----------------|----------------------------------------------------------------------------------------------|----------------------------------------------------------------------------------|
| Belgium  | Antwerpen      | GZA campus Sint-Augustinus                                                                   | Christine Vandeputte, MD<br>Katleen Plaskie, MD                                  |
| Belgium  | Brugge         | Algemeen Ziekenhuis Sint-Jan Brugge-Oostende AV                                              | Luc M.G.I. Cornette, MD, PhD<br>James D'haese, MD                                |
| Belgium  | Brussel        | Universitair Ziekenhuis Brussel                                                              | Filip Cools, MD, PhD<br>Michel Sonnaert, MD                                      |
| Belgium  | Liège          | CHC Clinique Saint-Vincent                                                                   | Anne Vervoort, MD<br>Pierre Maton, MD                                            |
| Belgium  | Liège          | CHR de la Citadelle                                                                          | Thibault Senterre, MD, PhD                                                       |
| Bulgaria | Pleven         | University Hospital Dr. Georgi Stranski                                                      | Victoria G. Atanasova, MD, PhD<br>Lyuben G. Veskov, MD                           |
| Bulgaria | Sofia          | Specialized hospital for obstetrics and gynecology active treatment - Shejnovo               | Donka P. Uzunova, MD<br>Zornica T. Malinova, MD                                  |
| France   | Nancy          | Maternité Régionale, CHRU de Nancy                                                           | Jean-Michel Hascoet, MD<br>Emily Greze, MD                                       |
| France   | Paris          | APHP Necker-Enfants Malades                                                                  | Alexandre Lapillonne, MD, PhD<br>Agnes Giuseppi, MD<br>Virginie Rigourd, MD, PhD |
| France   | Rennes         | CHU Rennes, Hôpital Sud                                                                      | Alain Beuchée, MD, PhD<br>Nadia Mazille, MD                                      |
| Germany  | Berlin         | Evangelisches Waldkrankenhaus Spandau                                                        | Frank Jochum, MD, PhD                                                            |
| Germany  | Dresden        | Klinik und Poliklinik für Kinder- und Jugendmedizin, Universitätsklinikum                    | Mario Rüdiger, MD, PhD<br>Katrin Weber, MD                                       |
| Germany  | Pforzheim      | Hospital Pforzheim                                                                           | Walter A. Mihatsch, MD, PhD<br>Rahel Schuler, MD                                 |
| Hungary  | Debrecen       | DEKK Gyermekklinika Neonatológiai Intenzív Centrum                                           | Andrea Nagy, MD<br>Gergely Balázs, MD                                            |
| Hungary  | Szeged         | Szegedi Tudományegyetem, Szent-Györgyi Albert Klinikai Központ, Perinatális Intenzív Centrum | Judit Kiss, MD<br>Anna Gajda, MD                                                 |
| Hungary  | Székesfehérvár | Szent György University Teaching Hospital of County Fejér                                    | Hajnalka Szabó, MD, PhD                                                          |
| Hungary  | Veszprem       | Ferenc Csolnoky Hospital                                                                     | Eva Szabo, MD<br>Tamas Tenk, MD                                                  |
| Israel   | Ashkelon       | Barzilai University Medical Center                                                           | Shmuel Zangen, MD<br>Mara Troitzky, MD                                           |
| Israel   | Beer Sheva     | Soroka Medical Center                                                                        | Kyla Marks, MD<br>Eilon Shany, MD                                                |
| Israel   | Haifa          | Bnai Zion Medical Center                                                                     | Arieh Riskin, MD, PhD                                                            |
| Israel   | Petah Tikva    | Schneider Children's Medical Center                                                          | Raanan Shamir, MD, PhD<br>Ruben Bromiker, MD<br>Gil Klinger, MD                  |

|                    |                           |                                                                                                       |                                                                                                    |
|--------------------|---------------------------|-------------------------------------------------------------------------------------------------------|----------------------------------------------------------------------------------------------------|
| Israel             | Haifa                     | Rambam Health Care Campus                                                                             | Ori Hochwald, MD<br>Huda Jubran, MD<br>Naim Shehadeh, MD                                           |
| Israel             | Ramat Gan                 | Sheba Medical Center                                                                                  | Strauss Tzipora, MD, MSc<br>Leibovitch Leah, MD                                                    |
| Israel             | Tel Aviv                  | Tel Aviv Medical Center, Dana<br>Dwek Children's Hospital                                             | Dror Mandel, MD<br>Alon Haham, MD                                                                  |
| Italy              | Ancona                    | AOU Ospedali Riuniti di Ancona                                                                        | Virgilio P. Carnielli, MD, PhD<br>Chiara Biagetti, MD<br>Maria P. Bellagamba, MD                   |
| Italy              | Milan                     | ASST FBF Sacco, Ospedale dei<br>Bambini "V. Buzzi"                                                    | Gianluca Lista, MD, PhD                                                                            |
| Italy              | Milan                     | Fondazione IRCCS Ca' Granda<br>Ospedale Maggiore Policlinico                                          | Paola Roggero, MD<br>Orsola Amato, MD                                                              |
| Italy              | Monza                     | MBBM Foundation, San Gerardo<br>Hospital                                                              | Paolo Tagliabue, MD                                                                                |
| Italy              | Roma                      | Fondazione Policlinico<br>Universitario A. Gemelli IRCCS -<br>Università Cattolica del Sacro<br>Cuore | Giovanni Vento, MD<br>Simonetta Costa, MD                                                          |
| Italy              | Varese                    | Ospedale Del Ponte, Università<br>degli Studi dell'Insubria                                           | Massimo Agosti, MD<br>Laura Morlacchi, MD                                                          |
| The<br>Netherlands | Amsterdam                 | Amsterdam University Medical<br>Centers, Emma Children's<br>Hospital                                  | Elise Mank, MD<br>Letty van Toledo, MD, PhD<br>Johannes B. van Goudoever, MD,<br>PhD               |
| The<br>Netherlands | Groningen                 | University Medical Center<br>Groningen, Beatrix Children's<br>Hospital                                | Elisabeth M.W. Kooi, MD, PhD<br>Arend F. Bos, MD, PhD                                              |
| The<br>Netherlands | Zwolle                    | Isala                                                                                                 | Richard A. van Lingen, MD, PhD<br>Astrid Giezen, RN                                                |
| Spain              | Barcelona                 | Vall d'Hebron University Hospital                                                                     | Felix Castillo, MD, PhD                                                                            |
| Spain              | Madrid                    | Hospital General Universitario<br>Gregorio Marañón                                                    | Manuel Sánchez Luna, MD, PhD<br>María del Carmen Sánchez Gómez<br>de Orgaz, MD                     |
| Spain              | Madrid                    | La Paz University Hospital                                                                            | Miguel Sáenz de Pipaón, MD, PhD<br>Marta Cabrera Lafuente, MD, PhD<br>Esperanza Escribano, MD, PhD |
| Spain              | Murcia                    | Virgen de la Arrixaca University<br>Hospital                                                          | Manuel Cidrás, MD, PhD<br>Macarena Quesada, PsyD                                                   |
| Spain              | Santiago de<br>Compostela | Complejo Hospitalario<br>Universitario de Santiago                                                    | Maria L. Couce, MD, PhD<br>Olalla López-Suárez, MD, PhD                                            |
| Spain              | Valencia                  | University and Polytechnic<br>Hospital La Fe                                                          | Máximo Vento, MD, PhD<br>María Gormaz, MD                                                          |
| United<br>Kingdom  | Bradford                  | Bradford Royal Infirmary                                                                              | Sam Oddie, MBBS<br>Rachel Wane, RN                                                                 |
| United<br>Kingdom  | Leicester                 | University Hospitals of Leicester<br>NHS Trust                                                        | Elaine M. Boyle, MD, PhD<br>Marie Hubbard, MSc, RGN, RNCB                                          |
| United<br>Kingdom  | Nottingham                | Nottingham University Hospitals<br>NHS Trust                                                          | Stephen P. Wardle MB, ChB,<br>FRCPCH, MD<br>Dushyant Batra, MD                                     |

|                |               |                                                                             |                                                     |
|----------------|---------------|-----------------------------------------------------------------------------|-----------------------------------------------------|
| United Kingdom | Portsmouth    | Portsmouth Hospitals University NHS Trust                                   | Tim Scorrer, MB, BCh<br>Charlotte Groves, MBBS      |
| United States  | Nashville     | Vanderbilt University Medical Center, Monroe Carell Jr. Children's Hospital | Joern-Hendrik Weitkamp, MD<br>Theresa J. Rogers, RN |
| United States  | Greenville    | East Carolina University                                                    | Ryan T. Moore, MD, FAAP<br>Devon Kuehn, MD          |
| United States  | Oklahoma City | University of Oklahoma College of Medicine                                  | Kimberly D. Ernst, MD                               |

**eTable 2.** Trial Steering Committee Members

| Name                                      | Institution                                                    | Country         |
|-------------------------------------------|----------------------------------------------------------------|-----------------|
| Johannes B. van Goudoever MD, PhD (chair) | Amsterdam University Medical Centers, Emma Children's Hospital | The Netherlands |
| Miguel Sáenz de Pipáon, MD, PhD           | La Paz University Hospital                                     | Spain           |
| Alexandre Lapillonne, MD, PhD             | APHP Necker-Enfants Malades                                    | France          |
| Virgilio P. Carnielli, MD, PhD            | AOU Ospedali Riuniti di Ancona                                 | Italy           |
| Thibault Senterre, MD, PhD                | CHR de la Citadelle                                            | Belgium         |

**eTable 3.** Enteral Nutrition Recommendation in the Study Protocol (ESPGHAN guidelines)<sup>(1)</sup>

| Birth weight (g) | Day 1* | Day 2 | Day 3 | Day 4 | Day 5 | Day 6  | Day 7   |
|------------------|--------|-------|-------|-------|-------|--------|---------|
| <1000            | 0–20   | 0–30  | 15–35 | 20–35 | 32–48 | 48–72  | 65–95   |
| ≥1000            | 0–20   | 0–30  | 20–50 | 50–60 | 75–80 | 80–100 | 100–120 |

\*Enteral nutrition in mL/kg/day

**eTable 4.** Total Fluid (Enteral and Parenteral) and Nutritive Components

|                         | Day 1   | Day 2   | Day 3   | Day 4   | Day 5   | Day 6   | Day 7   |
|-------------------------|---------|---------|---------|---------|---------|---------|---------|
| Total fluid (mL/kg/day) | 60–100  | 80–120  | 80–140  | 100–140 | 120–170 | 120–170 | 120–170 |
| Amino acids (g/kg/day)  | 1.5–2.5 | 2.5–3.5 | 3.0–4.0 | 3.0–4.0 | 3.0–4.5 | 3.0–4.5 | 3.0–4.5 |
| Fatty acids (g/kg/day)  | 0.0–2.0 | 1.0–3.0 | 2.0–3.5 | 2.5–3.5 | 3.0–4.0 | 3.0–4.0 | 3.0–4.0 |
| Glucose (g/kg/day)      | 5–10    | 8–10    | 10–12   | 11–13   | 11–13   | 11–13   | 11–13   |

**eTable 5.** Prespecified Sensitivity Analysis of the Primary Outcome\*

|                                                        | Low-dose rh-insulin (400 µIU/mL) | High-dose rh-insulin (2000 µIU/mL) | Placebo         |
|--------------------------------------------------------|----------------------------------|------------------------------------|-----------------|
| <b>Singletons and the first born sibling of a twin</b> |                                  |                                    |                 |
| N                                                      | 82                               | 72                                 | 73              |
| Median (IQR)                                           | 10.0 (7.0–21.8)                  | 10.0 (6.0–15.8)                    | 14.0 (8.0–28.0) |
| P-value <sup>††</sup>                                  | 0.12                             | 0.01                               | –               |
| <b>Imputation of missing data</b>                      |                                  |                                    |                 |
| N                                                      | 110                              | 95                                 | 98              |
| Median (IQR)                                           | 10.0 (7.0–23.0)                  | 10.0 (6.0–14.5)                    | 14.5 (8.0–28.0) |
| P-value <sup>††</sup>                                  | 0.04                             | <0.001                             | –               |

\*Primary outcome: time to achieve full enteral feeding (defined as an enteral intake ≥150 mL/kg/day for three consecutive days).

<sup>††</sup>P-value represents comparison between the active-treatment group and the placebo group.

## **eReferences**

1. Agostoni C, Buonocore G, Carnielli VP, et al. Enteral nutrient supply for preterm infants: commentary from the European Society of Paediatric Gastroenterology, Hepatology and Nutrition Committee on Nutrition. *J Pediatr Gastroenterol Nutr.* 2010;50(1):85-91.
