# Supplementary material
Source: PubMed Central journal article supplement (PMC8886453)
Supplement: jamapediatr-e220020-s004.pdf [file jamapediatr-e220020-s004.pdf]

| <b>*Group Name(s): FIT-04 Study Group</b> |                                   |                              |                         |                                                                                              |                                                 |                                                                |                                                                               |  |
|-------------------------------------------|-----------------------------------|------------------------------|-------------------------|----------------------------------------------------------------------------------------------|-------------------------------------------------|----------------------------------------------------------------|-------------------------------------------------------------------------------|--|
| <b>*First Name and Middle Initial(s)</b>  | <b>*Last Name</b>                 | <b>*Suffix (eg, Jr, III)</b> | <b>Academic Degrees</b> | <b>Institution</b>                                                                           | <b>Location (city, state/province, country)</b> | <b>Role or Contribution, eg, chair, principal investigator</b> | <b>Group (if more than 1 byline) and/or Subgroup (eg, Steering Committee)</b> |  |
| Johannes B.                               | van Goudoever                     |                              | MD, PhD                 | Amsterdam University Medical Centers, Emma Children's Hospital                               | Amsterdam, The Netherlands                      | Chair                                                          | Steering Committee                                                            |  |
| Elise                                     | Mank                              |                              | MD                      | Amsterdam University Medical Centers, Emma Children's Hospital                               | Amsterdam, The Netherlands                      |                                                                |                                                                               |  |
| Letty                                     | van Toledo                        |                              | MD, PhD                 | Amsterdam University Medical Centers, Emma Children's Hospital                               | Amsterdam, The Netherlands                      |                                                                |                                                                               |  |
| Elisabeth M.W.                            | Kooi                              |                              | MD, PhD                 | University Medical Center Groningen, Beatrix Children's Hospital                             | Groningen, The Netherlands                      |                                                                |                                                                               |  |
| Arend F.                                  | Bos                               |                              | MD, PhD                 | University Medical Center Groningen, Beatrix Children's Hospital                             | Groningen, The Netherlands                      |                                                                |                                                                               |  |
| Richard A.                                | van Lingen                        |                              | MD, PhD                 | Isala                                                                                        | Zwolle, The Netherlands                         |                                                                |                                                                               |  |
| Astrid                                    | Giezen                            |                              | RN                      | Isala                                                                                        | Zwolle, The Netherlands                         |                                                                |                                                                               |  |
| Miguel                                    | Sáenz de Pipáon                   |                              | MD, PhD                 | La Paz University Hospital                                                                   | Madrid, Spain                                   |                                                                | Steering Committee                                                            |  |
| Marta                                     | Cabrera Lafuente                  |                              | MD, PhD                 | La Paz University Hospital                                                                   | Madrid, Spain                                   |                                                                |                                                                               |  |
| Esperanza                                 | Escribano                         |                              | MD, PhD                 | La Paz University Hospital                                                                   | Madrid, Spain                                   |                                                                |                                                                               |  |
| Manuel                                    | Sánchez Luna                      |                              | MD, PhD                 | Hospital General Universitario Gregorio Marañón                                              | Madrid, Spain                                   |                                                                |                                                                               |  |
| María                                     | del Carmen Sánchez Gómez de Orgaz |                              | MD                      | Hospital General Universitario Gregorio Marañón                                              | Madrid, Spain                                   |                                                                |                                                                               |  |
| Felix                                     | Castillo                          |                              | MD, PhD                 | Vall d'Hebron University Hospital                                                            | Barcelona, Spain                                |                                                                |                                                                               |  |
| Manuel                                    | Cidrás                            |                              | MD, PhD                 | Virgen de la Arrixaca University Hospital                                                    | Murcia, Spain                                   |                                                                |                                                                               |  |
| Macarena                                  | Quesada                           |                              | PsyD                    | Virgen de la Arrixaca University Hospital                                                    | Murcia, Spain                                   |                                                                |                                                                               |  |
| María L.                                  | Couce                             |                              | MD, PhD                 | Complejo Hospitalario Universitario de Santiago                                              | Santiago de Compostela, Spain                   |                                                                |                                                                               |  |
| Olalla                                    | López-Suárez                      |                              | MD, PhD                 | Complejo Hospitalario Universitario de Santiago                                              | Santiago de Compostela, Spain                   |                                                                |                                                                               |  |
| Máximo                                    | Vento                             |                              | MD, PhD                 | University and Polytechnic Hospital La Fe                                                    | Valencia, Spain                                 |                                                                |                                                                               |  |
| María                                     | Gormaz                            |                              | MD                      | University and Polytechnic Hospital La Fe                                                    | Valencia, Spain                                 |                                                                |                                                                               |  |
| Alexandre                                 | Lapillonne                        |                              | MD, PhD                 | APHP Necker-Enfants Malades                                                                  | Paris, France                                   |                                                                | Steering Committee                                                            |  |
| Agnes                                     | Giuseppi                          |                              | MD                      | APHP Necker-Enfants Malades                                                                  | Paris, France                                   |                                                                |                                                                               |  |
| Virginie                                  | Rigourd                           |                              | MD, PhD                 | APHP Necker-Enfants Malades                                                                  | Paris, France                                   |                                                                |                                                                               |  |
| Jean-Michel                               | Hascoet                           |                              | MD                      | Maternité Régionale, CHRU de Nancy                                                           | Nancy, France                                   |                                                                |                                                                               |  |
| Emily                                     | Greze                             |                              | MD                      | Maternité Régionale, CHRU de Nancy                                                           | Nancy, France                                   |                                                                |                                                                               |  |
| Alain                                     | Beuchée                           |                              | MD, PhD                 | CHU Rennes, Hôpital Sud                                                                      | Rennes, France                                  |                                                                |                                                                               |  |
| Nadia                                     | Mazille                           |                              | MD                      | CHU Rennes, Hôpital Sud                                                                      | Rennes, France                                  |                                                                |                                                                               |  |
| Virgilio P.                               | Carnielli                         |                              | MD, PhD                 | AOU Ospedali Riuniti di Ancona                                                               | Ancona, Italy                                   |                                                                | Steering Committee                                                            |  |
| Chiara                                    | Biagetti                          |                              | MD                      | AOU Ospedali Riuniti di Ancona                                                               | Ancona, Italy                                   |                                                                |                                                                               |  |
| María P.                                  | Bellagamba                        |                              | MD                      | AOU Ospedali Riuniti di Ancona                                                               | Ancona, Italy                                   |                                                                |                                                                               |  |
| Gianluca                                  | Lista                             |                              | MD, PhD                 | ASST FBF Sacco, Ospedale dei Bambini "V. Buzzi"                                              | Milan, Italy                                    |                                                                |                                                                               |  |
| Paola                                     | Roggero                           |                              | MD                      | Fondazione IRCCS Ca' Granda Ospedale Maggiore Policlinico                                    | Milan, Italy                                    |                                                                |                                                                               |  |
| Orsola                                    | Amato                             |                              | MD                      | Fondazione IRCCS Ca' Granda Ospedale Maggiore Policlinico                                    | Milan, Italy                                    |                                                                |                                                                               |  |
| Paolo                                     | Tagliabue                         |                              | MD                      | MBBM Foundation, San Gerardo Hospital                                                        | Monza, Italy                                    |                                                                |                                                                               |  |
| Giovanni                                  | Vento                             |                              | MD                      | Fondazione Policlinico Universitario A. Gemelli IRCCS - Università Cattolica del Sacro Cuore | Roma, Italy                                     |                                                                |                                                                               |  |
| Simonetta                                 | Costa                             |                              | MD                      | Fondazione Policlinico Universitario A. Gemelli IRCCS - Università Cattolica del Sacro Cuore | Roma, Italy                                     |                                                                |                                                                               |  |
| Massimo                                   | Agosti                            |                              | MD                      | Ospedale Del Ponte, Università degli Studi dell'Insubria                                     | Varese, Italy                                   |                                                                |                                                                               |  |
| Laura                                     | Morlacchi                         |                              | MD                      | Ospedale Del Ponte, Università degli Studi dell'Insubria                                     | Varese, Italy                                   |                                                                |                                                                               |  |
| Thibault                                  | Senterre                          |                              | MD, PhD                 | CHR de la Citadelle                                                                          | Liège, Belgium                                  |                                                                | Steering Committee                                                            |  |
| Anne                                      | Vervoort                          |                              | MD                      | CHC Clinique Saint-Vincent                                                                   | Liège, Belgium                                  |                                                                |                                                                               |  |
| Pierre                                    | Maton                             |                              | MD                      | CHC Clinique Saint-Vincent                                                                   | Liège, Belgium                                  |                                                                |                                                                               |  |
| Christine                                 | Vandeputte                        |                              | MD                      | GZA campus Sint-Augustinus                                                                   | Antwerpen, Belgium                              |                                                                |                                                                               |  |
| Katleen                                   | Plaskie                           |                              | MD                      | GZA campus Sint-Augustinus                                                                   | Antwerpen, Belgium                              |                                                                |                                                                               |  |
| Luc M.G.I.                                | Cornette                          |                              | MD, PhD                 | Algemeen Ziekenhuis Sint-Jan Brugge-Oostende AV                                              | Brugge, Belgium                                 |                                                                |                                                                               |  |
| James                                     | D'haese                           |                              | MD                      | Algemeen Ziekenhuis Sint-Jan Brugge-Oostende AV                                              | Brugge, Belgium                                 |                                                                |                                                                               |  |
| Filip                                     | Cools                             |                              | MD, PhD                 | Universitair Ziekenhuis Brussel                                                              | Brussel, Belgium                                |                                                                |                                                                               |  |
| Michel                                    | Sonnaert                          |                              | MD                      | Universitair Ziekenhuis Brussel                                                              | Brussel, Belgium                                |                                                                |                                                                               |  |
| Raanan                                    | Shamir                            |                              | MD, PhD                 | Schneider Children's Medical Center                                                          | Petah Tikva, Israel                             |                                                                | Steering Committee                                                            |  |
| Ruben                                     | Bromiker                          |                              | MD                      | Schneider Children's Medical Center                                                          | Petah Tikva, Israel                             |                                                                |                                                                               |  |
| Gil                                       | Klinger                           |                              | MD                      | Schneider Children's Medical Center                                                          | Petah Tikva, Israel                             |                                                                |                                                                               |  |
| Shmuel                                    | Zangen                            |                              | MD                      | Barzilai University Medical Center                                                           | Ashkelon, Israel                                |                                                                |                                                                               |  |
| Mara                                      | Troitzky                          |                              | MD                      | Barzilai University Medical Center                                                           | Ashkelon, Israel                                |                                                                |                                                                               |  |
| Kyla                                      | Marks                             |                              | MD                      | Soroka Medical Center                                                                        | Beer Sheva, Israel                              |                                                                |                                                                               |  |
| Eilon                                     | Shany                             |                              | MD                      | Soroka Medical Center                                                                        | Beer Sheva, Israel                              |                                                                |                                                                               |  |
| Arieh                                     | Riskin                            |                              | MD, PhD                 | Bnai Zion Medical Center                                                                     | Haifa, Israel                                   |                                                                |                                                                               |  |
| Ori                                       | Hochwald                          |                              | MD                      | Rambam Health Care Campus                                                                    | Haifa, Israel                                   |                                                                |                                                                               |  |
| Huda                                      | Jubran                            |                              | MD                      | Rambam Health Care Campus                                                                    | Haifa, Israel                                   |                                                                |                                                                               |  |

\*Indicates required information. Only first name, last name, and suffix will appear in PubMed.

| *First Name and Middle Initial(s) | *Last Name | *Suffix (eg, Jr, III) | Academic Degrees    | Institution                                                                                  | Location (city, state/province, country) | Role or Contribution, eg, chair, principal investigator | Group (if more than 1 Group listed in the byline) and/or Subgroup (eg, Steering Committee) |
|-----------------------------------|------------|-----------------------|---------------------|----------------------------------------------------------------------------------------------|------------------------------------------|---------------------------------------------------------|--------------------------------------------------------------------------------------------|
| Naim                              | Shehadeh   |                       | MD                  | Rambam Health Care Campus                                                                    | Haifa, Israel                            |                                                         |                                                                                            |
| Strauss                           | Tzipora    |                       | MD, MSc             | Sheba Medical Center                                                                         | Ramat Gan, Israel                        |                                                         |                                                                                            |
| Leibovitch                        | Leah       |                       | MD                  | Sheba Medical Center                                                                         | Ramat Gan, Israel                        |                                                         |                                                                                            |
| Dror                              | Mandel     |                       | MD                  | Tel Aviv Medical Center, Dana Dwek Children's Hospital                                       | Tel Aviv, Israel                         |                                                         |                                                                                            |
| Alon                              | Haham      |                       | MD                  | Tel Aviv Medical Center, Dana Dwek Children's Hospital                                       | Tel Aviv, Israel                         |                                                         |                                                                                            |
| Victoria G.                       | Atanasova  |                       | MD, PhD             | University Hospital Dr. Georgi Stranski                                                      | Pleven, Bulgaria                         |                                                         |                                                                                            |
| Lyuben G.                         | Veskov     |                       | MD                  | University Hospital Dr. Georgi Stranski                                                      | Pleven, Bulgaria                         |                                                         |                                                                                            |
| Donka P.                          | Uzunova    |                       | MD                  | Specialized hospital for obstetrics and gynecology active treatment - Shejnov                | Sofia, Bulgaria                          |                                                         |                                                                                            |
| Zornica T.                        | Malinova   |                       | MD                  | Specialized hospital for obstetrics and gynecology active treatment - Shejnov                | Sofia, Bulgaria                          |                                                         |                                                                                            |
| Frank                             | Jochum     |                       | MD, PhD             | Evangelisches Waldkrankenhaus Spandau                                                        | Berlin, Germany                          |                                                         |                                                                                            |
| Mario                             | Rüdiger    |                       | MD, PhD             | Klinik und Poliklinik für Kinder- und Jugendmedizin, Universitätsklinikum                    | Dresden, Germany                         |                                                         |                                                                                            |
| Katrin                            | Weber      |                       | MD                  | Klinik und Poliklinik für Kinder- und Jugendmedizin, Universitätsklinikum                    | Dresden, Germany                         |                                                         |                                                                                            |
| Walter A.                         | Mihatsch   |                       | MD, PhD             | Hospital Pforzheim                                                                           | Pforzheim, Germany                       |                                                         |                                                                                            |
| Rahel                             | Schuler    |                       | MD                  | Hospital Pforzheim                                                                           | Pforzheim, Germany                       |                                                         |                                                                                            |
| Andrea                            | Nagy       |                       | MD                  | DEKK Gyermekklinika Neonatológiai Intenzív Centrum                                           | Debrecen, Hungary                        |                                                         |                                                                                            |
| Gergely                           | Balázs     |                       | MD                  | DEKK Gyermekklinika Neonatológiai Intenzív Centrum                                           | Debrecen, Hungary                        |                                                         |                                                                                            |
| Judit                             | Kiss       |                       | MD                  | Szegedi Tudományegyetem, Szent-Györgyi Albert Klinikai Központ, Perinatális Intenzív Centrum | Szeged, Hungary                          |                                                         |                                                                                            |
| Anna                              | Gajda      |                       | MD                  | Szegedi Tudományegyetem, Szent-Györgyi Albert Klinikai Központ, Perinatális Intenzív Centrum | Szeged, Hungary                          |                                                         |                                                                                            |
| Hajnalka                          | Szabó      |                       | MD, PhD             | Szent György University Teaching Hospital of County Fejér                                    | Székesfehérvár, Hungary                  |                                                         |                                                                                            |
| Eva                               | Szabo      |                       | MD                  | Ferenc Csolnoky Hospital                                                                     | Veszprem, Hungary                        |                                                         |                                                                                            |
| Tamas                             | Tenk       |                       | MD                  | Ferenc Csolnoky Hospital                                                                     | Veszprem, Hungary                        |                                                         |                                                                                            |
| Sam                               | Oddie      |                       | MBBS                | Bradford Royal Infirmary                                                                     | Bradford, United Kingdom                 |                                                         |                                                                                            |
| Rachel                            | Wane       |                       | RN                  | Bradford Royal Infirmary                                                                     | Bradford, United Kingdom                 |                                                         |                                                                                            |
| Elaine M.                         | Boyle      |                       | MD, PhD             | University Hospitals of Leicester NHS Trust                                                  | Leicester, United Kingdom                |                                                         |                                                                                            |
| Marie                             | Hubbard    |                       | MSc, RGN, RNCB      | University Hospitals of Leicester NHS Trust                                                  | Leicester, United Kingdom                |                                                         |                                                                                            |
| Stephen P.                        | Wardle     |                       | MB, ChB, FRCPCH, MD | Nottingham University Hospitals NHS Trust                                                    | Nottingham, United Kingdom               |                                                         |                                                                                            |
| Dushyant                          | Batra      |                       | MD                  | Nottingham University Hospitals NHS Trust                                                    | Nottingham, United Kingdom               |                                                         |                                                                                            |
| Tim                               | Scorrrer   |                       | MB, BCh             | Portsmouth Hospitals University NHS Trust                                                    | Portsmouth, United Kingdom               |                                                         |                                                                                            |
| Charlotte                         | Groves     |                       | MBBS                | Portsmouth Hospitals University NHS Trust                                                    | Portsmouth, United Kingdom               |                                                         |                                                                                            |
| Joern-Hendrik                     | Weitkamp   |                       | MD                  | Vanderbilt University Medical Center, Monroe Carell Jr. Children's Hospital                  | Nashville, United States                 |                                                         |                                                                                            |
| Theresa J.                        | Rogers     |                       | RN                  | Vanderbilt University Medical Center, Monroe Carell Jr. Children's Hospital                  | Nashville, United States                 |                                                         |                                                                                            |
| Ryan T.                           | Moore      |                       | MD, FAAP            | East Carolina University                                                                     | Greenville, United States                |                                                         |                                                                                            |
| Devon                             | Kuehn      |                       | MD                  | East Carolina University                                                                     | Greenville, United States                |                                                         |                                                                                            |
| Kimberly D.                       | Ernst      |                       | MD                  | University of Oklahoma College of Medicine                                                   | Oklahoma City, United States             |                                                         |                                                                                            |
