# Supplementary material
Source: PubMed Central journal article supplement (PMC8886453)
Supplement: jamapediatr-e220020-s005.pdf [file jamapediatr-e220020-s005.pdf]

## Data Sharing Statement

Mank. Efficacy and Safety of Enteral Recombinant Human Insulin in Preterm Infants. *JAMA Pediatr.* Published February 28, 2022. doi:10.1001/jamapediatrics.2022.0020

### Data

**Data available:** No
